# Supplementary material for: A Systematic Method for the Identification of Aporphine Alkaloid Constituents in Sabia schumanniana Diels Using UHPLC-Q-Exactive Orbitrap/Mass Spectrometry
Source: MDPI journal article supplement (doi:10.3390/molecules27217643), 2022-11-07
Supplement: s1 [file s1]

**Table S1.** The chromatographic and mass data of detected components from *Sabia schumanniana* Diels though UHPLC-Q-Exactive Orbitrap MS.

| Peak | $t_{R(min)}$ | Theoretical Mass<br>$m/z$ | Experimental Mass<br>$m/z$ | Error<br>(ppm) | Formula<br>(M+H) <sup>+</sup> or (M) <sup>+</sup>                 | MS/MS fragment<br>(+)                                                                                                     | Identification                                               |
|------|--------------|---------------------------|----------------------------|----------------|-------------------------------------------------------------------|---------------------------------------------------------------------------------------------------------------------------|--------------------------------------------------------------|
| 1    | 3.32         | 358.1649                  | 358.1652                   | 0.81           | [C <sub>20</sub> H <sub>24</sub> NO <sub>5</sub> ] <sup>+</sup>   | MS <sup>2</sup> [358]:<br>58.0660(100),<br>255.0667(1),<br>227.0703(2),<br>287.0917(4)                                    | C <sub>6a</sub> -hydroxylation of<br>magnoflorine            |
| 2    | 4.02         | 490.2072                  | 490.2079                   | 1.43           | [C <sub>25</sub> H <sub>31</sub> NO <sub>9</sub> +H] <sup>+</sup> | MS <sup>2</sup> [490]:<br>297.1122(100),<br>237.0914(10),<br>265.0861(85),<br>328.1546(36)                                | 11-glc-norisocorydine<br>isomer                              |
| 3    | 4.05         | 312.1594                  | 312.1600                   | 1.86           | [C <sub>19</sub> H <sub>22</sub> NO <sub>3</sub> ] <sup>+</sup>   | MS <sup>2</sup> [312]:<br>58.0660(100),<br>207.0811(1),<br>267.1014(3)                                                    | C <sub>2</sub> -O-demethylation of<br>magnoflorine<br>isomer |
| 4    | 4.28         | 358.1649                  | 358.1656                   | 1.84           | [C <sub>20</sub> H <sub>24</sub> NO <sub>5</sub> ] <sup>+</sup>   | MS <sup>2</sup> [358]:<br>58.0659(100),<br>253.0863(14),<br>281.0809(40),<br>285.0740(4),<br>313.1071(45)                 | trilobinine isomer                                           |
| 5    | 5.33         | 278.1175                  | 278.1178                   | 1.20           | [C <sub>18</sub> H <sub>15</sub> NO <sub>2</sub> +H] <sup>+</sup> | MS <sup>2</sup> [278]:107.0497(100),<br>246.0928(6),<br>262.0858(17)                                                      | dehydroroemerine                                             |
| 6    | 5.40         | 328.1543                  | 328.1546                   | 0.81           | [C <sub>19</sub> H <sub>22</sub> NO <sub>4</sub> +H] <sup>+</sup> | MS <sup>2</sup> [328]:58.0660(100),<br>177.0551(2),<br>222.1118(4),<br>265.0862(17),<br>283.0967(34)                      | boldine isomer                                               |
| 7    | 5.71         | 340.1543                  | 340.1552                   | 2.66           | [C <sub>20</sub> H <sub>22</sub> NO <sub>4</sub> ] <sup>+</sup>   | MS <sup>2</sup> [340]:<br>263.0705(100),<br>58.0660(13),<br>235.0756(29),<br>295.0965(24)                                 | N-methylbulbocapnine<br>isomer                               |
| 8    | 5.72         | 358.1649                  | 358.1651                   | 0.56           | [C <sub>20</sub> H <sub>24</sub> NO <sub>5</sub> ] <sup>+</sup>   | MS <sup>2</sup> [358]:58.0660(100),<br>281.0818(4),<br>285.0774(3),<br>295.0966(25),<br>313.1071(22)                      | trilobinine isomer                                           |
| 9    | 5.77         | 314.1386                  | 314.1389                   | 0.75           | [C <sub>18</sub> H <sub>19</sub> NO <sub>4</sub> +H] <sup>+</sup> | MS <sup>2</sup> [314]:<br>265.0861(100),<br>58.0660(77),<br>165.0913(1),<br>205.0658(1),<br>237.0910(31),<br>297.1124(66) | laurolictsine                                                |
| 10   | 5.81         | 298.1437                  | 298.1440                   | 0.70           | [C <sub>18</sub> H <sub>19</sub> NO <sub>3</sub> +H] <sup>+</sup> | MS <sup>2</sup> [278]:192.1022(100)                                                                                       | apoglaziovine                                                |

| Peak | $t_{R(min)}$ | Theoretical Mass<br>$m/z$ | Experimental Mass<br>$m/z$ | Error<br>(ppm) | Formula<br>(M+H) <sup>+</sup> or (M) <sup>+</sup>                 | MS/MS fragment<br>(+)                                                                                                                                                                                                                                                                                                                                                                                                                                                                                                                                                                                                                                                                                                                                                                                                                                                                                | Identification                                                              |
|------|--------------|---------------------------|----------------------------|----------------|-------------------------------------------------------------------|------------------------------------------------------------------------------------------------------------------------------------------------------------------------------------------------------------------------------------------------------------------------------------------------------------------------------------------------------------------------------------------------------------------------------------------------------------------------------------------------------------------------------------------------------------------------------------------------------------------------------------------------------------------------------------------------------------------------------------------------------------------------------------------------------------------------------------------------------------------------------------------------------|-----------------------------------------------------------------------------|
| 11   | 5.83         | 312.1594                  | 312.1595                   | 0.51           | [C <sub>19</sub> H <sub>22</sub> NO <sub>3</sub> ] <sup>+</sup>   | 0), 58.0659(10),<br>254.0953(19),<br>283.1197(3)<br>MS <sup>2</sup> [312]:<br>205.1100(100),<br>58.0660(19),<br>207.0819(4),<br>267.1017(62)<br>MS <sup>2</sup> [328]:<br>58.0660(100),<br>237.0907(1),<br>283.0966(74),<br>297.1108(3)<br>MS <sup>2</sup> [490]:<br>265.0861(100),<br>192.1019(15),<br>237.0901(2),<br>297.1122(25),<br>328.1544(32)<br>MS <sup>2</sup> [340]:<br>263.0704(100),<br>58.0659(13),<br>235.0755(29),<br>295.0962(27)<br>MS <sup>2</sup> [358]:<br>58.0660(100),<br>281.0808(6),<br>285.0773(3),<br>295.0966(29),<br>313.1071(28)<br>MS <sup>2</sup> [344]:<br>58.0659(100),<br>137.0598(30),<br>143.0493(13),<br>175.0754(34),<br>299.1278(12)<br>MS <sup>2</sup> [328]:<br>58.0659(100),<br>237.0911(3),<br>252.1143(5),<br>268.1098(3),<br>283.1341(26)<br>MS <sup>2</sup> [328]:<br>283.0965(100),<br>58.0659(25),<br>237.0913(5),<br>265.0858(20),<br>297.1123(14) | C <sub>2</sub> -O-demethylation of<br>magnoflorine<br>isomer                |
| 12   | 5.88         | 328.1543                  | 328.1545                   | 0.35           | [C <sub>19</sub> H <sub>22</sub> NO <sub>4</sub> +H] <sup>+</sup> |                                                                                                                                                                                                                                                                                                                                                                                                                                                                                                                                                                                                                                                                                                                                                                                                                                                                                                      | boldine isomer                                                              |
| 13   | 5.99         | 490.2072                  | 490.2076                   | 0.98           | [C <sub>25</sub> H <sub>31</sub> NO <sub>9</sub> +H] <sup>+</sup> |                                                                                                                                                                                                                                                                                                                                                                                                                                                                                                                                                                                                                                                                                                                                                                                                                                                                                                      | 11-glc-norisocorydine<br>isomer                                             |
| 14   | 6.04         | 340.1543                  | 340.1545                   | 0.52           | [C <sub>20</sub> H <sub>22</sub> NO <sub>4</sub> ] <sup>+</sup>   |                                                                                                                                                                                                                                                                                                                                                                                                                                                                                                                                                                                                                                                                                                                                                                                                                                                                                                      |                                                                             |
| 15   | 6.05         | 358.1649                  | 358.1651                   | 0.48           | [C <sub>20</sub> H <sub>24</sub> NO <sub>5</sub> ] <sup>+</sup>   |                                                                                                                                                                                                                                                                                                                                                                                                                                                                                                                                                                                                                                                                                                                                                                                                                                                                                                      | N-methylbulbocapnine<br>isomer                                              |
| 16   | 6.22         | 344.1856                  | 344.1857                   | 0.10           | [C <sub>20</sub> H <sub>26</sub> NO <sub>4</sub> ] <sup>+</sup>   |                                                                                                                                                                                                                                                                                                                                                                                                                                                                                                                                                                                                                                                                                                                                                                                                                                                                                                      | trilobinine isomer                                                          |
| 17   | 6.30         | 328.1907                  | 328.1908                   | 0.15           | [C <sub>20</sub> H <sub>26</sub> NO <sub>3</sub> ] <sup>+</sup>   |                                                                                                                                                                                                                                                                                                                                                                                                                                                                                                                                                                                                                                                                                                                                                                                                                                                                                                      | zizyphusine+2H                                                              |
| 18   | 6.40         | 328.1543                  | 328.1544                   | 0.26           | [C <sub>19</sub> H <sub>22</sub> NO <sub>4</sub> +H] <sup>+</sup> |                                                                                                                                                                                                                                                                                                                                                                                                                                                                                                                                                                                                                                                                                                                                                                                                                                                                                                      | N-ring<br>opening-C <sub>1</sub> -dehydroxylation<br>of magnoflorine isomer |

| Peak | $t_{R(min)}$ | Theoretical Mass<br>$m/z$ | Experimental Mass<br>$m/z$ | Error<br>(ppm) | Formula<br>(M+H) <sup>+</sup> or (M) <sup>+</sup>                 | MS/MS fragment<br>(+)                                                                                      | Identification                                               |
|------|--------------|---------------------------|----------------------------|----------------|-------------------------------------------------------------------|------------------------------------------------------------------------------------------------------------|--------------------------------------------------------------|
| 19   | 6.70         | 342.1700                  | 342.1702                   | 0.54           | [C <sub>20</sub> H <sub>24</sub> NO <sub>4</sub> ] <sup>+</sup>   | MS <sup>2</sup> [342]:<br>58.0660(100),<br>237.0903(11),<br>265.0853(74),<br>282.0880(13),<br>297.1115(69) | boldine isomer                                               |
| 20   | 6.79         | 374.1598                  | 374.1596                   | 0.47           | [C <sub>20</sub> H <sub>24</sub> NO <sub>6</sub> ] <sup>+</sup>   | MS <sup>2</sup> [374]:<br>58.0659(100),<br>297.1079(1),<br>329.1034(1)                                     | magnoflorine isomer                                          |
| 21   | 7.04         | 312.1594                  | 312.1597                   | 1.09           | [C <sub>19</sub> H <sub>22</sub> NO <sub>3</sub> ] <sup>+</sup>   | MS <sup>2</sup> [312]:<br>267.1017(100),<br>58.0659(39),<br>207.0814(2)                                    | Di-hydroxylation of<br>magnoflorine                          |
| 22   | 7.31         | 358.2013                  | 358.2012                   | -0.32          | [C <sub>21</sub> H <sub>28</sub> NO <sub>4</sub> ] <sup>+</sup>   | MS <sup>2</sup> [358]:<br>58.0660(100),<br>281.0813(7),<br>313.1446(5)                                     | C <sub>2</sub> -O-demethylation of<br>magnoflorine<br>isomer |
| 23   | 7.38         | 282.1489                  | 282.1490                   | 0.58           | [C <sub>18</sub> H <sub>19</sub> NO <sub>2</sub> +H] <sup>+</sup> | MS <sup>2</sup> [282]:<br>237.0911(100),<br>58.0660(90),<br>191.0855(5),<br>219.0806(23),<br>251.1063(1)   | pareirarinea isomer                                          |
| 24   | 7.44         | 340.1543                  | 340.1546                   | 0.78           | [C <sub>20</sub> H <sub>22</sub> NO <sub>4</sub> ] <sup>+</sup>   | MS <sup>2</sup> [340]:<br>263.0703(100),<br>189.0692(2),<br>217.0644(8),<br>235.0754(21),<br>295.0966(42)  | lirinidine isomer                                            |
| 25   | 7.53         | 328.1543                  | 328.1545                   | 0.35           | [C <sub>19</sub> H <sub>22</sub> NO <sub>4</sub> +H] <sup>+</sup> | MS <sup>2</sup> [328]:<br>58.0660(100),<br>178.0864(81),<br>265.0860(41),<br>283.0968(43),<br>297.1123(15) | N-methylbulbocapnine<br>isomer                               |
| 26   | 7.58         | 358.2013                  | 358.2008                   | 1.41           | [C <sub>21</sub> H <sub>28</sub> NO <sub>4</sub> ] <sup>+</sup>   | MS <sup>2</sup> [358]:<br>58.0660(100),<br>281.0815(7),<br>313.1059(8)                                     | boldine isomer                                               |
| 27*  | 7.58         | 342.1700                  | 342.1703                   | 0.89           | [C <sub>20</sub> H <sub>24</sub> NO <sub>4</sub> ] <sup>+</sup>   | MS <sup>2</sup> [342]:<br>265.0852(100),<br>58.0658(21),<br>282.0877(4),<br>297.1123(48),<br>237.0905(4)   | pareirarinea isomer                                          |
| 28   | 7.67         | 294.1488                  | 294.1491                   | 0.76           | [C <sub>19</sub> H <sub>19</sub> NO <sub>2</sub> +H] <sup>+</sup> | MS <sup>2</sup> [294]:<br>217.0650(100),                                                                   | magnoflorine                                                 |

| Peak | $t_{R(min)}$ | Theoretical Mass<br>$m/z$ | Experimental Mass<br>$m/z$ | Error<br>(ppm) | Formula<br>(M+H) <sup>+</sup> or (M) <sup>+</sup>                 | MS/MS fragment<br>(+)                                                                                                                                                                 | Identification                                                                            |
|------|--------------|---------------------------|----------------------------|----------------|-------------------------------------------------------------------|---------------------------------------------------------------------------------------------------------------------------------------------------------------------------------------|-------------------------------------------------------------------------------------------|
| 29   | 7.68         | 312.1594                  | 312.1597                   | 0.90           | [C <sub>19</sub> H <sub>22</sub> NO <sub>3</sub> ] <sup>+</sup>   | 58.0659(2),<br>279.1269(5),<br>263.0711(5),<br>250.0958(2)<br>MS <sup>2</sup> [312]: 217.0649<br>(100), 58.0659(57),<br>218.0692(7),<br>237.0875(15),<br>252.0784(5),<br>267.1017(15) | dehydronuciferine isomer                                                                  |
| 30   | 7.69         | 354.1700                  | 354.1704                   | 1.12           | [C <sub>21</sub> H <sub>24</sub> NO <sub>4</sub> +H] <sup>+</sup> | MS <sup>2</sup> [354]:<br>58.0660(100),<br>251.1074(11),<br>309.1119(33)                                                                                                              | C <sub>2</sub> -O-demethylation of<br>magnoflorine<br>isomer                              |
| 31   | 7.72         | 282.1489                  | 282.1491                   | 0.80           | [C <sub>18</sub> H <sub>19</sub> NO <sub>2</sub> +H] <sup>+</sup> | MS <sup>2</sup> [282]:<br>237.0911(100),<br>58.0660(95),<br>191.0862(5),<br>219.0807(24)                                                                                              | N-methyl nantenine                                                                        |
| 32   | 7.87         | 312.1594                  | 312.1597                   | 0.90           | [C <sub>19</sub> H <sub>21</sub> NO <sub>3</sub> +H] <sup>+</sup> | MS <sup>2</sup> [312]:<br>267.1016(100),<br>58.0659(56),<br>217.0650(45),<br>280.1064(9),<br>294.1487(9)                                                                              | lirinidine isomer                                                                         |
| 33   | 8.04         | 344.1492                  | 344.1495                   | 0.85           | [C <sub>19</sub> H <sub>22</sub> NO <sub>5</sub> ] <sup>+</sup>   | MS <sup>2</sup> [344]:<br>58.0660(100),<br>237.0907(6),<br>265.0860(29),<br>283.0926(10)                                                                                              | isothebaine isomer                                                                        |
| 34   | 8.04         | 374.1598                  | 374.1603                   | 1.49           | [C <sub>20</sub> H <sub>24</sub> NO <sub>6</sub> ] <sup>+</sup>   | MS <sup>2</sup> [374]:<br>58.0659(100),<br>297.0756(5),<br>329.1017(43)                                                                                                               | N-CH <sub>3</sub> -hydroxylation of<br>C <sub>2</sub> -O-demethylation of<br>magnoflorine |
| 35   | 8.10         | 358.1649                  | 358.1653                   | 1.23           | [C <sub>20</sub> H <sub>24</sub> NO <sub>5</sub> ] <sup>+</sup>   | MS <sup>2</sup> [358]:<br>313.1071(28),<br>58.0660(51),<br>253.0859(4),<br>281.0804(13),<br>285.0804(13)                                                                              | Di-hydroxylation of<br>magnoflorine                                                       |
| 36   | 8.35         | 356.1856                  | 356.1858                   | 0.52           | [C <sub>21</sub> H <sub>26</sub> NO <sub>4</sub> ] <sup>+</sup>   | MS <sup>2</sup> [356]:<br>58.0660(100),<br>236.0833(3),<br>264.0785(10),<br>251.1066(9),<br>279.1018(79),<br>280.1082(30),<br>296.1038(19),                                           | trilobinine isomer                                                                        |

| Peak | $t_{R(min)}$ | Theoretical Mass<br>$m/z$ | Experimental Mass<br>$m/z$ | Error<br>(ppm) | Formula<br>(M+H) <sup>+</sup> or (M) <sup>+</sup>                 | MS/MS fragment<br>(+)                                                                                                                                                                                               | Identification                                                                                      |
|------|--------------|---------------------------|----------------------------|----------------|-------------------------------------------------------------------|---------------------------------------------------------------------------------------------------------------------------------------------------------------------------------------------------------------------|-----------------------------------------------------------------------------------------------------|
| 37   | 8.42         | 312.1594                  | 312.1594                   | 0.19           | [C <sub>19</sub> H <sub>21</sub> NO <sub>3</sub> +H] <sup>+</sup> | 311.1280(21)<br>MS <sup>2</sup> [312]:<br>217.0650(100),<br>58.0659(67),<br>280.1064(9),<br>294.1490(23),<br>296.1046(8),<br>MS <sup>2</sup> [340]:<br>58.0660(100),<br>220.0526(2),<br>264.0755(7),<br>309.1354(4) | menisperine isomer                                                                                  |
| 38   | 8.66         | 340.1543                  | 340.1548                   | 0.87           | [C <sub>20</sub> H <sub>21</sub> NO <sub>4</sub> +H] <sup>+</sup> | MS <sup>2</sup> [340]:<br>263.0703(100),<br>58.0659(33),<br>235.0751(3),<br>295.0965(22)                                                                                                                            | isothebaine isomer                                                                                  |
| 39   | 8.70         | 340.1543                  | 340.1546                   | 0.69           | [C <sub>20</sub> H <sub>22</sub> NO <sub>4</sub> ] <sup>+</sup>   | MS <sup>2</sup> [328]:<br>58.0659(100),<br>251.1067(6),<br>253.1226(2),<br>283.1328(19)                                                                                                                             | crebanine                                                                                           |
| 40   | 8.72         | 328.1907                  | 328.1906                   | -0.24          | [C <sub>21</sub> H <sub>28</sub> NO <sub>4</sub> ] <sup>+</sup>   | MS <sup>2</sup> [400]:<br>58.0660(100),<br>295.0961(2),<br>323.0918(32),<br>355.1180(29)                                                                                                                            | N-methylbulbocapnine isomer                                                                         |
| 41   | 8.83         | 400.1755                  | 400.1757                   | 0.64           | [C <sub>22</sub> H <sub>26</sub> NO <sub>6</sub> ] <sup>+</sup>   | MS <sup>2</sup> [342]:<br>58.0659(100),<br>237.0912(7),<br>265.0860(49),<br>282.0894(7),<br>297.1122(45)                                                                                                            | N-ring opening-C <sub>1</sub> -dehydroxylation of magnoflorine isomer                               |
| 42   | 8.97         | 342.1700                  | 342.1702                   | 0.63           | [C <sub>20</sub> H <sub>24</sub> NO <sub>4</sub> ] <sup>+</sup>   | MS <sup>2</sup> [356]:<br>58.0660(100),<br>251.0709(12),<br>279.1016(66),<br>280.1085(21),<br>296.1035(13),<br>311.0925(18)                                                                                         | C <sub>10</sub> -OCH <sub>3</sub> -hydroxylation and C <sub>11</sub> -O-acetylation of magnoflorine |
| 43   | 9.18         | 356.1856                  | 356.1857                   | 0.27           | [C <sub>21</sub> H <sub>26</sub> NO <sub>4</sub> ] <sup>+</sup>   | MS <sup>2</sup> [296]:<br>251.1068(100),<br>58.0660(26),<br>219.0807(24),<br>221.0957(1),<br>236.0826(2)                                                                                                            | magnoflorine isomer                                                                                 |
| 44   | 9.71         | 296.1645                  | 296.1646                   | 0.45           | [C <sub>19</sub> H <sub>22</sub> NO <sub>2</sub> ] <sup>+</sup>   | MS <sup>2</sup> [282]:<br>251.1067(100),                                                                                                                                                                            | menisperine isomer                                                                                  |
| 45*  | 10.29        | 282.1489                  | 282.1495                   | 0.43           | [C <sub>18</sub> H <sub>19</sub> NO <sub>2</sub> +H] <sup>+</sup> |                                                                                                                                                                                                                     | C <sub>1</sub> -demethoxy-C <sub>2</sub> -dehydrox of                                               |

| Peak | $t_{R(min)}$ | Theoretical Mass<br>$m/z$ | Experimental Mass<br>$m/z$ | Error<br>(ppm) | Formula<br>(M+H) <sup>+</sup> or (M) <sup>+</sup>                 | MS/MS fragment<br>(+)                                                                                                                    | Identification                                   |
|------|--------------|---------------------------|----------------------------|----------------|-------------------------------------------------------------------|------------------------------------------------------------------------------------------------------------------------------------------|--------------------------------------------------|
|      |              |                           |                            |                |                                                                   | 58.0660(13),<br>191.0856(5),<br>219.0806(39)<br>MS <sup>2</sup> [314]:                                                                   | magnoflorine isomer                              |
| 46   | 10.32        | 374.1598                  | 374.1599                   | 0.34           | [C <sub>20</sub> H <sub>24</sub> NO <sub>6</sub> ] <sup>+</sup>   | 329.1022(100),<br>58.0659(14),<br>297.0758(1)<br>MS <sup>2</sup> [294]:                                                                  | lirinidine                                       |
| 47   | 11.27        | 294.1488                  | 294.1491                   | 1.07           | [C <sub>19</sub> H <sub>19</sub> NO <sub>2</sub> +H] <sup>+</sup> | 217.0650(100),<br>58.0658(1),<br>236.0831(1),<br>250.0946(3),<br>263.1286(1),<br>279.1256(8)<br>MS <sup>2</sup> [384]:                   | di-hydroxylation of<br>magnoflorine              |
| 48   | 11.76        | 384.1805                  | 384.1812                   | 1.64           | [C <sub>22</sub> H <sub>26</sub> NO <sub>5</sub> ] <sup>+</sup>   | 325.1070(100),<br>58.0659(18),<br>251.1067(4),<br>279.1019(10),<br>292.0738(9),<br>307.0953(4),<br>339.1230(4)<br>MS <sup>2</sup> [356]: | dehydronuciferine isomer                         |
| 49   | 12.82        | 356.1856                  | 356.1861                   | 1.39           | [C <sub>21</sub> H <sub>26</sub> NO <sub>4</sub> ] <sup>+</sup>   | 58.0660(100),<br>251.1067(12),<br>279.1018(77),<br>280.1084(27),<br>296.1043(21),<br>311.1273(16)<br>MS <sup>2</sup> [282]:              | C <sub>1</sub> -O-acetylation of<br>magnoflorine |
| 50*  | 12.86        | 282.1489                  | 282.1493                   | 1.54           | [C <sub>18</sub> H <sub>19</sub> NO <sub>2</sub> +H] <sup>+</sup> | 265.1224(100),<br>58.0659(8),<br>234.1041(25),<br>250.0990(60)<br>MS <sup>2</sup> [266]:                                                 | menisperine isomer                               |
| 51   | 12.94        | 266.1176                  | 266.1178                   | 1.15           | [C <sub>17</sub> H <sub>15</sub> NO <sub>2</sub> +H] <sup>+</sup> | 131.0494(100),<br>191.0855(3),<br>219.0804(14),<br>249.0912(76)<br>MS <sup>2</sup> [310]:                                                | N-nornuciferine                                  |
| 52   | 13.07        | 294.1489                  | 294.1491                   | 0.23           | [C <sub>19</sub> H <sub>20</sub> NO <sub>2</sub> ] <sup>+</sup>   | 58.0659(100),<br>191.0862(1),<br>219.0805(4),<br>249.0911(55)<br>MS <sup>2</sup> [280]:                                                  | anonaine                                         |
| 53*  | 13.10        | 280.1332                  | 280.1336                   | 1.45           | [C <sub>18</sub> H <sub>18</sub> NO <sub>2</sub> +H] <sup>+</sup> | 249.0912(100),<br>58.0659(3),<br>191.0863(3),                                                                                            | roemrefidine                                     |

| Peak | $t_{R(min)}$ | Theoretical Mass<br>$m/z$ | Experimental Mass<br>$m/z$ | Error<br>(ppm) | Formula<br>(M+H) <sup>+</sup> or (M) <sup>+</sup>                 | MS/MS fragment<br>(+)                                                                                                         | Identification                                                                                                                      |
|------|--------------|---------------------------|----------------------------|----------------|-------------------------------------------------------------------|-------------------------------------------------------------------------------------------------------------------------------|-------------------------------------------------------------------------------------------------------------------------------------|
| 54   | 13.34        | 292.0968                  | 292.0972                   | 1.40           | [C <sub>18</sub> H <sub>13</sub> NO <sub>3</sub> +H] <sup>+</sup> | 219.0805(13)<br>MS <sup>2</sup> [292]:277.1099(10),<br>248.0717(8),<br>264.0999(5)<br>MS <sup>2</sup> [324]:<br>58.0659(100), | roemerine                                                                                                                           |
| 55   | 13.50        | 324.1230                  | 324.1235                   | 1.56           | [C <sub>19</sub> H <sub>17</sub> NO <sub>4</sub> +H] <sup>+</sup> | 177.0554(3),<br>263.0940(12),<br>293.1054(6)<br>MS <sup>2</sup> [356]:<br>58.0659(100),                                       | lysicamine isomers                                                                                                                  |
| 56   | 13.53        | 356.1492                  | 356.1496                   | 0.99           | [C <sub>20</sub> H <sub>22</sub> NO <sub>5</sub> ] <sup>+</sup>   | 251.0703(1),<br>279.1028(7),<br>311.0918(22)<br>MS <sup>2</sup> [294]:<br>295.1328(100),                                      | neolitsine isomer                                                                                                                   |
| 57   | 13.83        | 312.1230                  | 312.1231                   | 0.33           | [C <sub>18</sub> H <sub>17</sub> NO <sub>4</sub> +H] <sup>+</sup> | 58.0659(31),<br>264.1164(52),<br>265.0865(21),<br>280.1095(90)<br>MS <sup>2</sup> [312]:<br>295.1329(100),                    | C <sub>5</sub> -methylene to ketone of<br>magnoflorine                                                                              |
| 58   | 13.94        | 312.1594                  | 312.1598                   | 1.28           | [C <sub>19</sub> H <sub>21</sub> NO <sub>3</sub> +H] <sup>+</sup> | 58.0659(31),<br>217.0649(90),<br>280.1095(90),<br>296.1357(16)<br>MS <sup>2</sup> [310]:<br>58.0659(100),                     | nandigerine                                                                                                                         |
| 59   | 14.11        | 310.1438                  | 310.1441                   | 0.97           | [C <sub>19</sub> H <sub>20</sub> NO <sub>3</sub> ] <sup>+</sup>   | 177.0555(1),<br>205.0648(3),<br>237.0909(13),<br>265.0859(20)<br>MS <sup>2</sup> [310]:<br>58.0660(100),                      | isothebaine isomer                                                                                                                  |
| 60   | 14.22        | 310.1437                  | 310.1440                   | 0.87           | [C <sub>19</sub> H <sub>19</sub> NO <sub>3</sub> +H] <sup>+</sup> | 279.1008(1),<br>264.0792(1),<br>MS <sup>2</sup> [296]:<br>251.1068(100),<br>58.0660(15),                                      | C <sub>1</sub> -demethoxy<br>-C <sub>2</sub> -dehydrox-C <sub>10</sub> ,C <sub>11</sub> -Ethyl<br>epoxide of magnoflorine<br>isomer |
| 61   | 14.26        | 296.1645                  | 296.1649                   | 1.20           | [C <sub>19</sub> H <sub>22</sub> NO <sub>2</sub> ] <sup>+</sup>   | 219.0805(31),<br>220.0842(3),<br>221.0957(1),<br>236.0834(3)<br>MS <sup>2</sup> [294]:<br>217.0650(100),                      | stephanine                                                                                                                          |
| 62   | 14.61        | 294.1488                  | 294.1493                   | 1.38           | [C <sub>19</sub> H <sub>19</sub> NO <sub>2</sub> +H] <sup>+</sup> | 58.0660(8),<br>279.1257(9),<br>263.1296(1),250.0945(                                                                          | C <sub>1</sub> -demethoxy<br>-C <sub>2</sub> -dehydrox of<br>magnoflorine isomer                                                    |

| Peak | $t_{R(min)}$ | Theoretical Mass<br>$m/z$ | Experimental Mass<br>$m/z$ | Error<br>(ppm) | Formula<br>(M+H) <sup>+</sup> or (M) <sup>+</sup>                 | MS/MS fragment<br>(+)                                                                                      | Identification                                                                                                                      |
|------|--------------|---------------------------|----------------------------|----------------|-------------------------------------------------------------------|------------------------------------------------------------------------------------------------------------|-------------------------------------------------------------------------------------------------------------------------------------|
| 63   | 15.99        | 294.1124                  | 294.1125                   | 0.07           | [C <sub>18</sub> H <sub>15</sub> NO <sub>3</sub> +H] <sup>+</sup> | 1)<br>MS <sup>2</sup> [294]:<br>262.0863(100),<br>58.0658(1),<br>239.0951(1),<br>257.1901(1)               | dehydronuciferine isomer                                                                                                            |
| 64   | 17.08        | 310.1438                  | 310.1441                   | 0.97           | [C <sub>19</sub> H <sub>20</sub> NO <sub>3</sub> ] <sup>+</sup>   | MS <sup>2</sup> [310]:<br>233.0961(100),<br>58.0661(12),<br>177.1288(1),<br>265.1220(23)                   | N-formyl-annonain                                                                                                                   |
| 65   | 17.39        | 324.1230                  | 324.1231                   | 0.33           | [C <sub>19</sub> H <sub>17</sub> NO <sub>4</sub> +H] <sup>+</sup> | MS <sup>2</sup> [324]:<br>264.1019(100),<br>233.0831(22),<br>263.0940(31),<br>265.1077(22)                 | C <sub>1</sub> -demethoxy<br>-C <sub>2</sub> -dehydrox-C <sub>10</sub> ,C <sub>11</sub> -Ethyl<br>epoxide of magnoflorine<br>isomer |
| 66   | 18.00        | 308.1281                  | 308.1283                   | 0.49           | [C <sub>19</sub> H <sub>17</sub> NO <sub>3</sub> +H] <sup>+</sup> | MS <sup>2</sup> [308]:<br>249.0914(100),<br>191.0859(6),<br>219.0806(23)                                   | neolitsine isomer                                                                                                                   |
| 67   | 18.18        | 324.1230                  | 324.1234                   | 1.16           | [C <sub>19</sub> H <sub>17</sub> NO <sub>4</sub> +H] <sup>+</sup> | MS <sup>2</sup> [324]:<br>264.1018(100),<br>58.0660(53),<br>233.0827(17),<br>263.0926(17),<br>265.1074(16) | N-acetylanonaine                                                                                                                    |
| 68   | 18.53        | 292.0968                  | 292.0972                   | 1.12           | [C <sub>18</sub> H <sub>13</sub> NO <sub>3</sub> +H] <sup>+</sup> | MS <sup>2</sup> [292]:277.1039(100),<br>248.0712(8),<br>264.1024(13)                                       | neolitsine isomer                                                                                                                   |
| 69   | 18.81        | 292.0968                  | 292.0971                   | 0.89           | [C <sub>18</sub> H <sub>13</sub> NO <sub>3</sub> +H] <sup>+</sup> | MS <sup>2</sup> [292]:264.1018(100),<br>248.0702(8),<br>277.0734(48)                                       | lysicamine isomers                                                                                                                  |
| 70   | 19.08        | 338.1386                  | 338.1387                   | 0.13           | [C <sub>20</sub> H <sub>19</sub> NO <sub>4</sub> +H] <sup>+</sup> | MS <sup>2</sup> [338]:<br>307.1201(100),<br>279.1258(4),<br>308.1265(10),<br>323.1153(16)                  | lysicamine isomers                                                                                                                  |
|      |              |                           |                            |                |                                                                   |                                                                                                            | sinomendine                                                                                                                         |

\* identified by comparison with standards.
